# Supplementary material for: An in vitro organ-on-chip model for studying neuron–keratinocyte interactions in sensory response through electrophysiology
Source: Royal Society of Chemistry journal article supplement (doi:10.1039/d5lc00867k), 2025-12-03
Supplement: d5lc00867k1.pdf [file d5lc00867k1.pdf]

**Supplementary figures :**

**An In Vitro Organ-on-Chip Model for Studying Neuron-Keratinocyte Interactions In Sensory Response Through Electrophysiology**

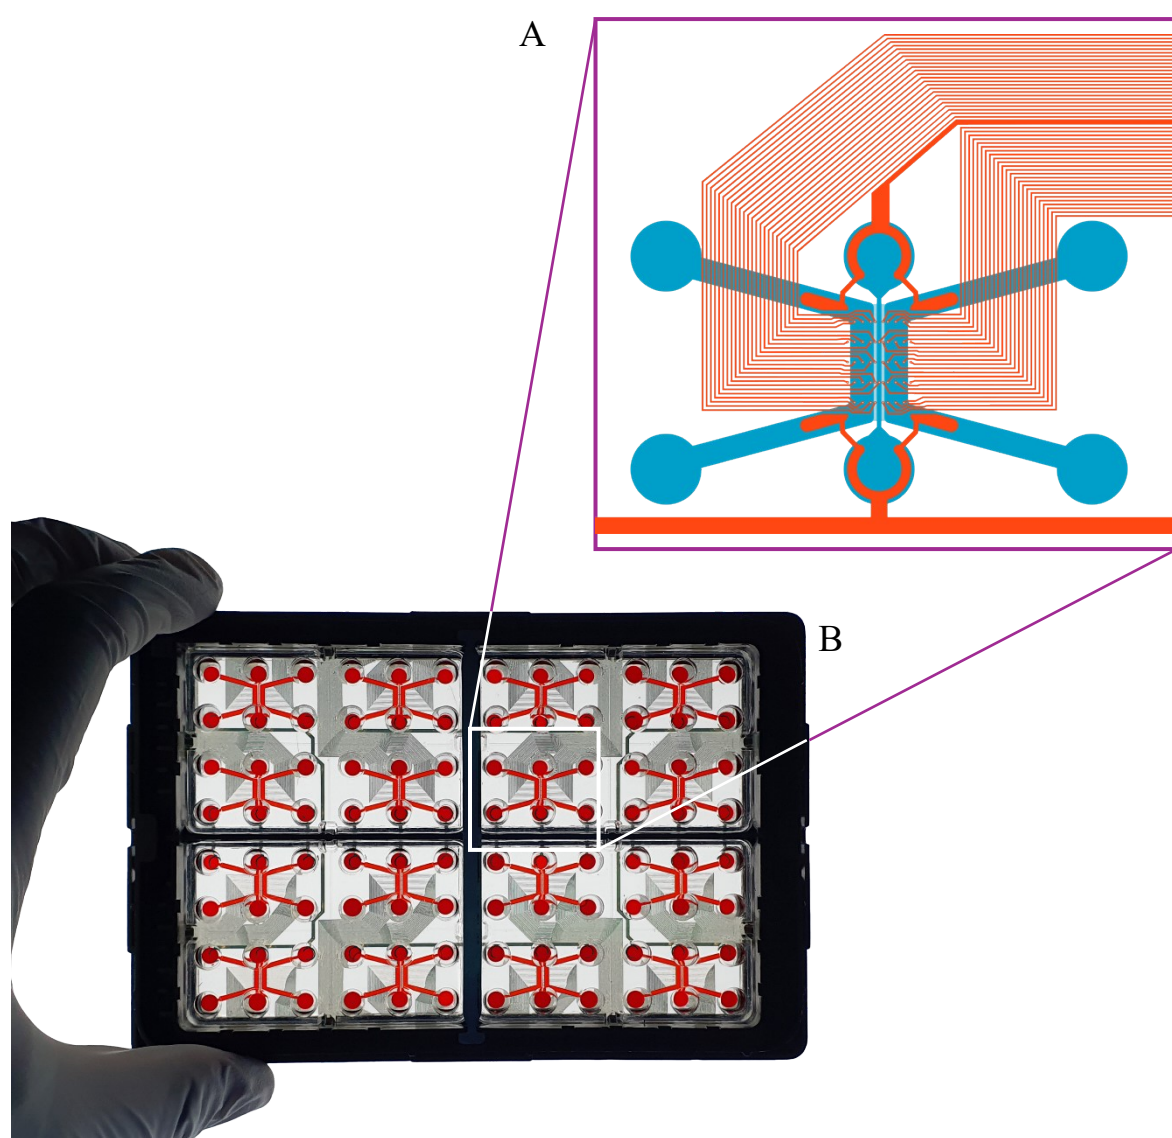

Supplementary Figure 1:

A) Schematic of the DuaLink MEA microfluidic device with electrode layout (red) and channel architecture (blue).

B) Image of a 16-device MEA plate used for simultaneous recordings of multiple samples.

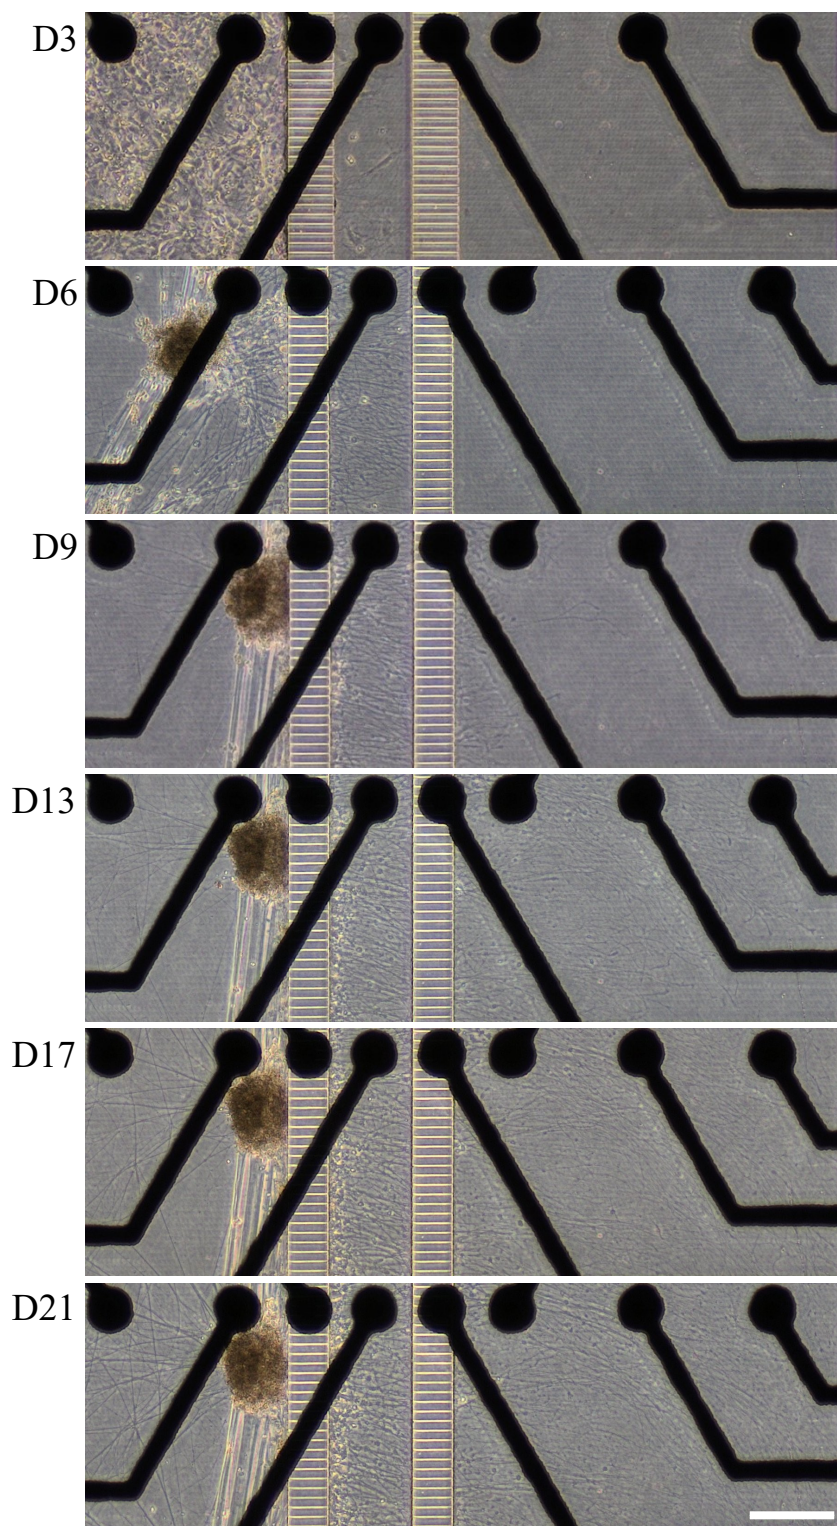

Supplementary Figure 2:

Transmitted light images of human iPSC-derived sensory neurons cultured in microfluidic devices over 21 days.

Scale bar: 200  $\mu\text{m}$ .



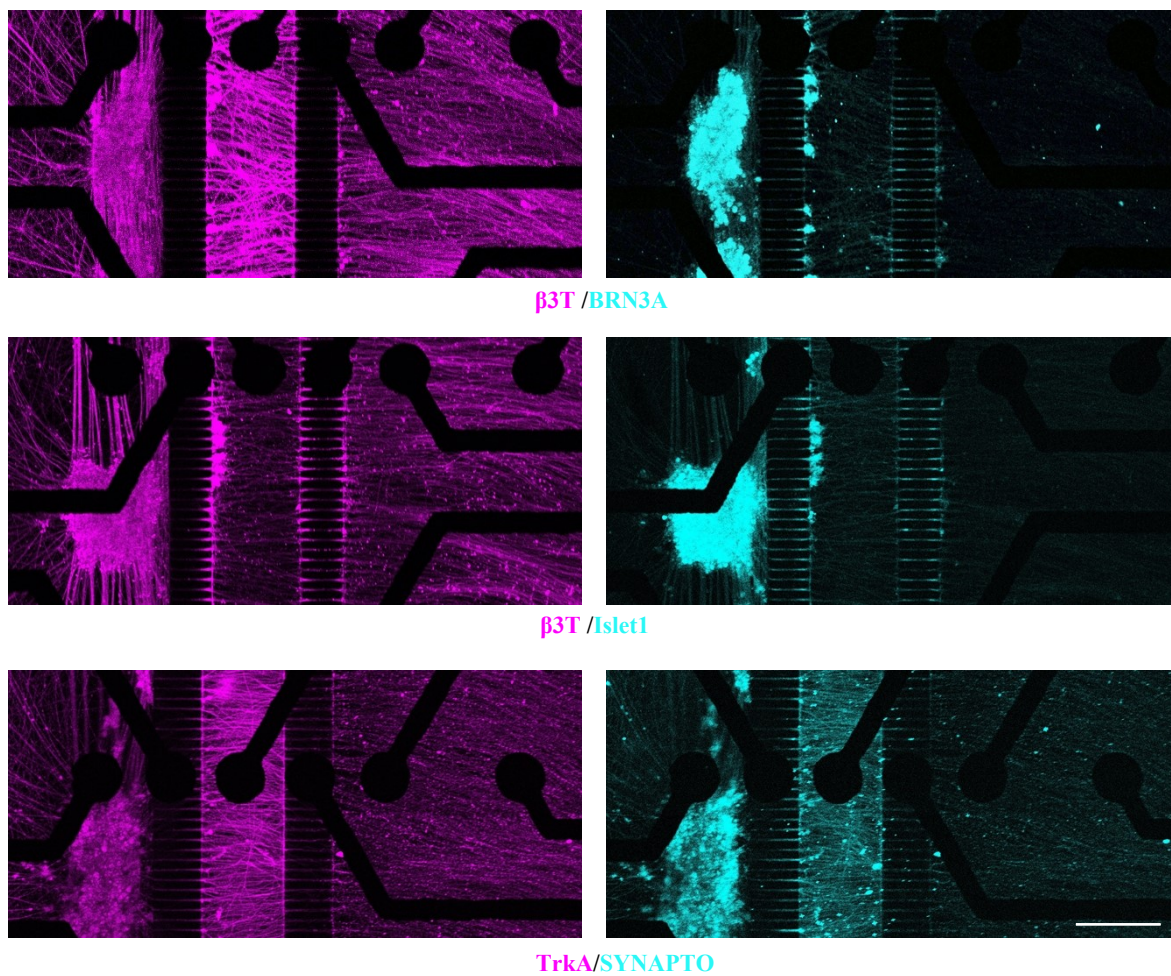

Supplementary Figure 3:

Immunofluorescence staining of sensory neurons. BRN3A, Islet1, and synaptophysin (cyan), co-stained with either  $\beta$ III-tubulin (magenta) or TrkA (magenta).

Scale bar: 200  $\mu$ m.

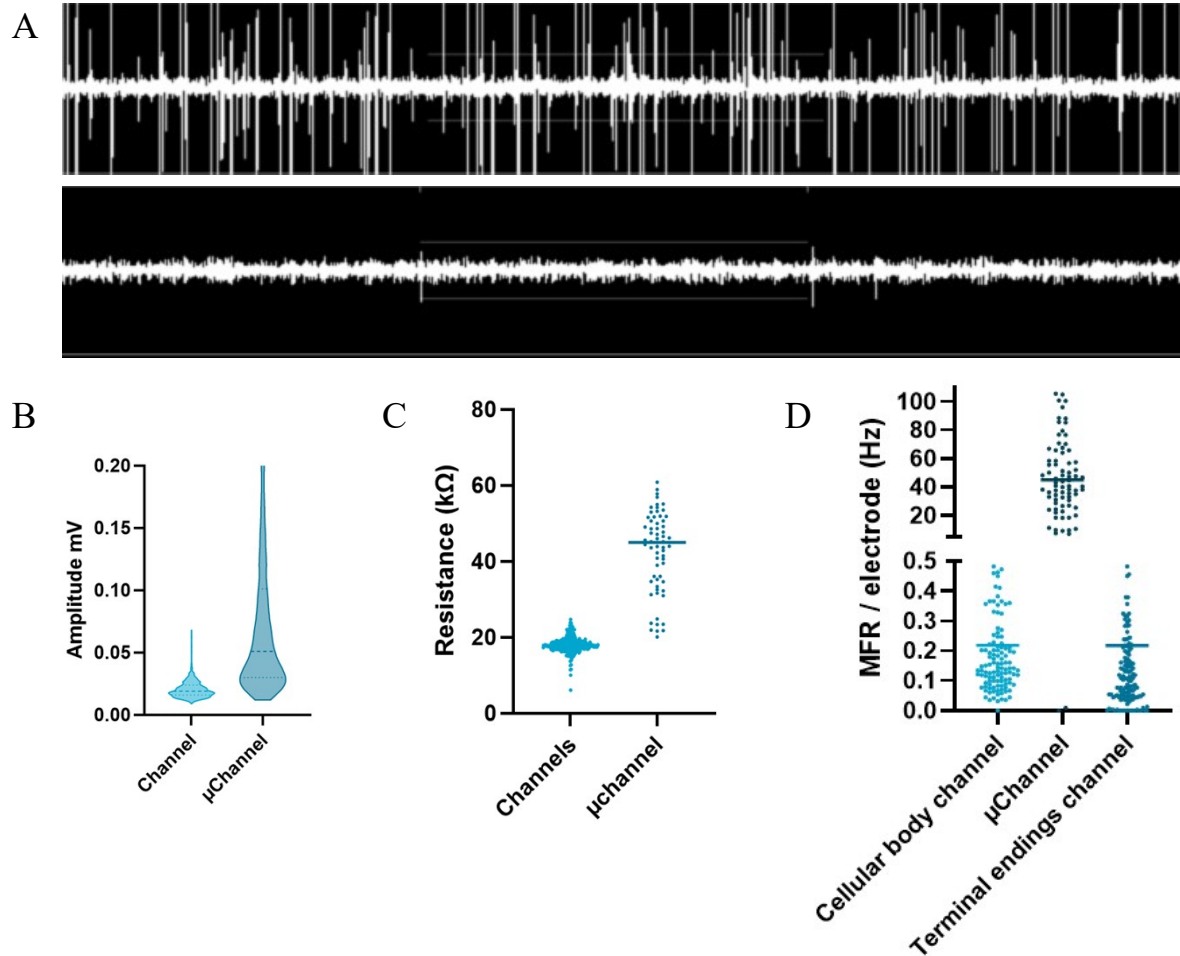

Supplementary Figure 4:

A) Representative MEA traces recorded from unstimulated iPSC-derived sensory neurons recorded with a microchannel electrode (top) and a channel electrode (bottom).

B) Quantification of spike amplitudes recorded over a 5-minute period in channels vs. microchannels.

C) Comparison of electrode resistance between channel and microchannel configurations.

D) Comparison of mean firing rates recorded in channel vs. microchannel electrodes.

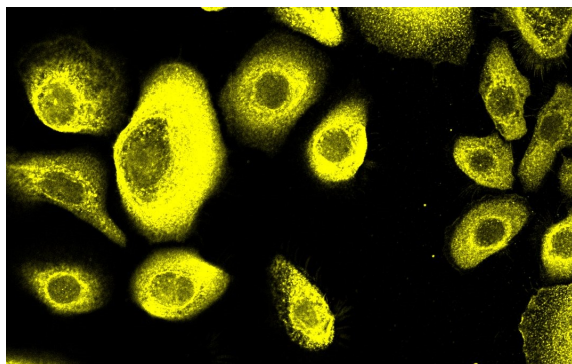

CK14

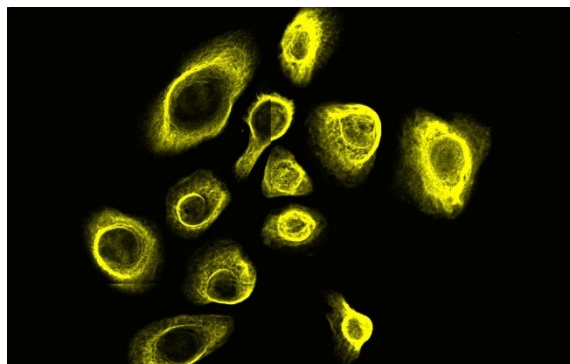

P2X3

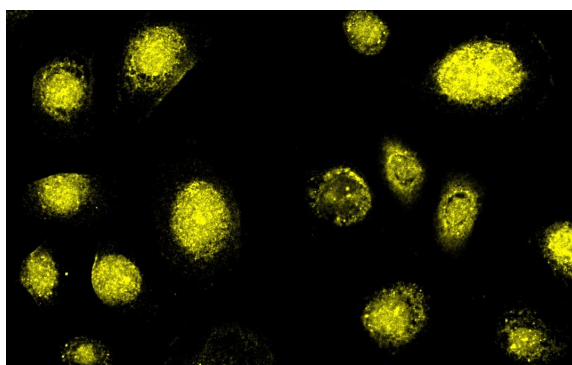

TRPA1

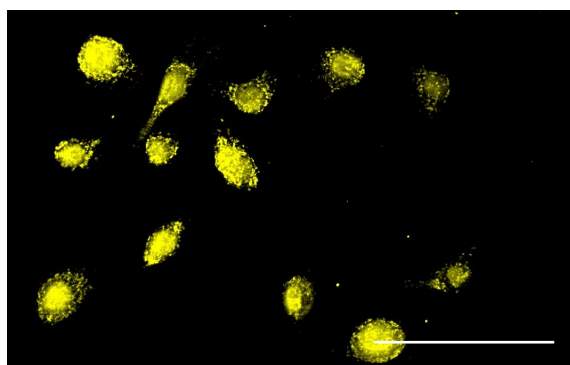

TRPV1

Supplementary Figure 5:

Immunofluorescence staining of primary human keratinocytes for cytokeratin 14 (CK14), P2X3, TRPA1 and TRPV1.

Scale bar: 100  $\mu$ m.

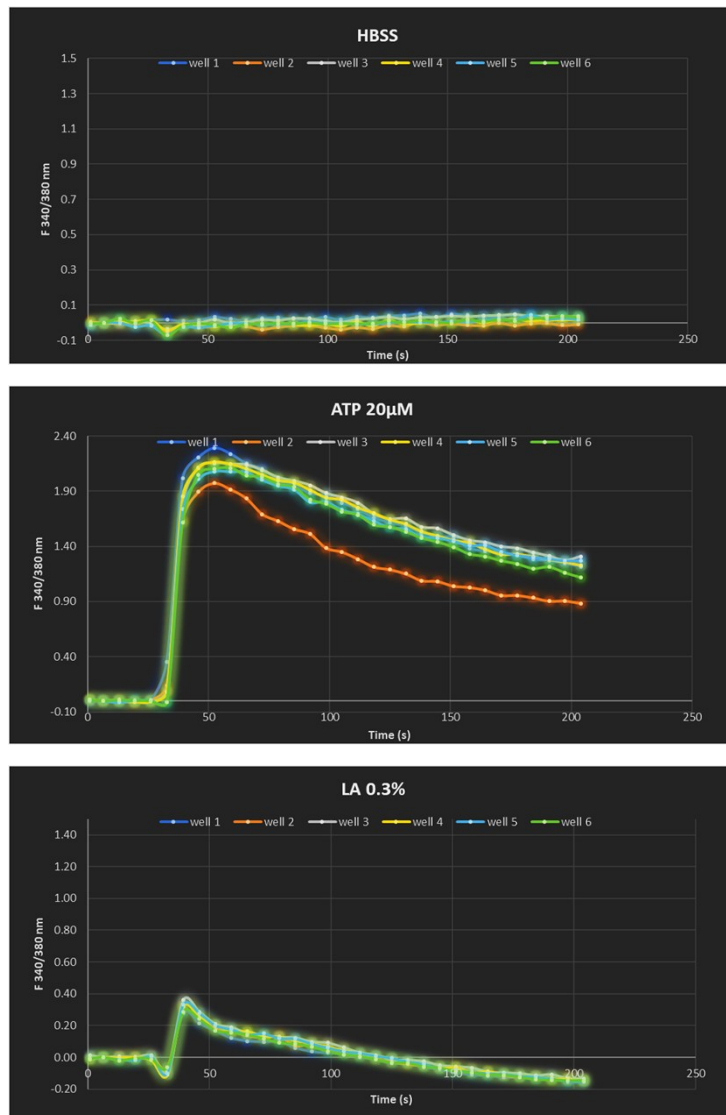

Supplementary Figure 6:

Fura-2 fluorescence ratio (340/380 nm) in primary human keratinocytes following treatment with vehicle (negative control), ATP (20  $\mu$ M), or lactic acid (0.3%).
